# Supplementary material
Source: Springer Nature journal article supplement (https://www.springermedizin.de/resource/supplementary/13024_2008_52_MOESM2_ESM.pdf/9643278)

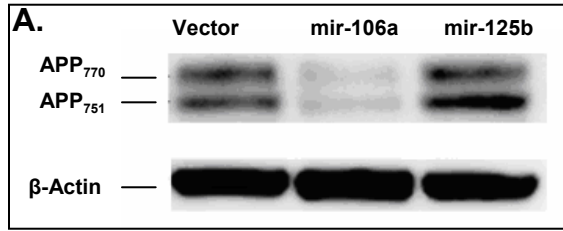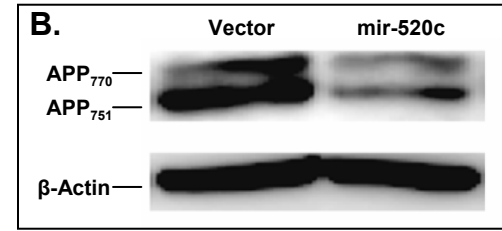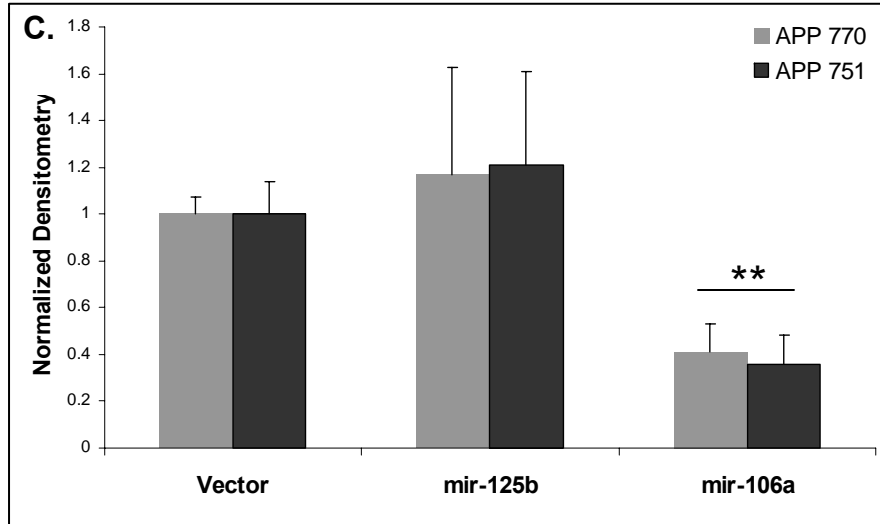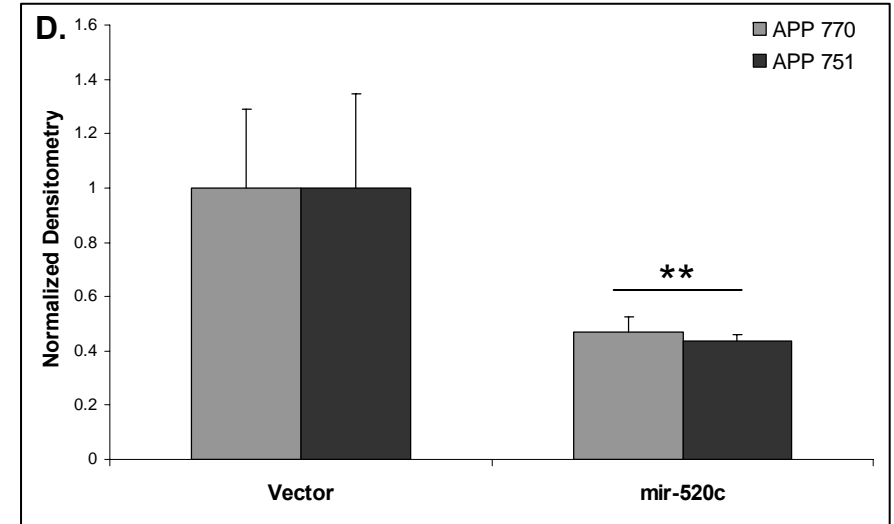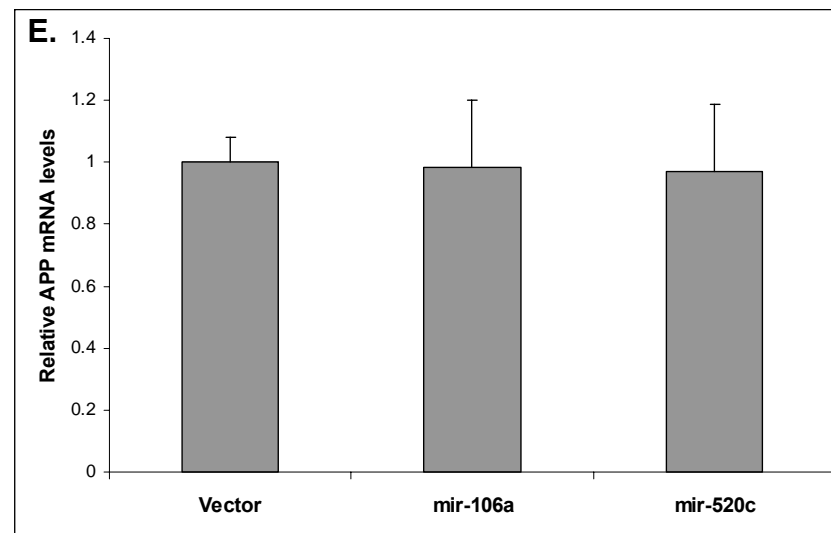

Supplement: MOESM2 [file 9643278]
